# Supplementary material for: The Relationship of Anxiety and Stress With Working Memory Performance in a Large Non-depressed Sample
Source: Front Psychol. 2019 Jan 23;10:4. doi: 10.3389/fpsyg.2019.00004 (PMC6351483; doi:10.3389/fpsyg.2019.00004)
Supplement: TABLE S1 — Zero-order correlations between the WM tasks. [file Table_1.docx]

Supplementary Table 1

*Zero-order correlations between the WM tasks*

|  | 1 | 2 | 3 | 4 | 5 | 6 | 7 | 8 | 9 | 10 |
| --- | --- | --- | --- | --- | --- | --- | --- | --- | --- | --- |
| 1. Verbal RMT | 1 |  |  |  |  |  |  |  |  |  |
| 1. Visual RMT | .308** | 1 |  |  |  |  |  |  |  |  |
| 1. Verbal CST | .293** | .319** | 1 |  |  |  |  |  |  |  |
| 1. Visual CST | .281** | .436** | .342** | 1 |  |  |  |  |  |  |
| 1. Verbal SSTF | .359** | .291** | .439** | .330** | 1 |  |  |  |  |  |
| 1. Visual SSTF | .271** | .469** | .288** | .489** | .369** | 1 |  |  |  |  |
| 1. Verbal SSTB | .436** | .318** | .450** | .391** | .599** | .350** | 1 |  |  |  |
| 1. Visual SSTB | .283** | .435** | .364** | .407** | .331** | .558** | .376** | 1 |  |  |
| 1. Verbal 2-back | .229** | .370** | .288** | .330** | .250** | .366** | .277** | .435** | 1 |  |
| 1. Visual 2-back | .256** | .396** | .360** | .387** | .238** | .344** | .306** | .409** | .543** | 1 |

Note: double asterisk (**) indicates p < .01.

RMT: Running Memory Task; CST: Complex Span Task; SSTF: Simple Span Task Forward; SSTB: Simple Span Task Backward
